# Supplementary material for: A Multi-Parameter, High-Content, High-Throughput Screening Platform to Identify Natural Compounds that Modulate Insulin and Pdx1 Expression
Source: PubMed Central journal article supplement (PMC2944895; doi:10.1371/journal.pone.0012958), 2010-09-23

Figure S1

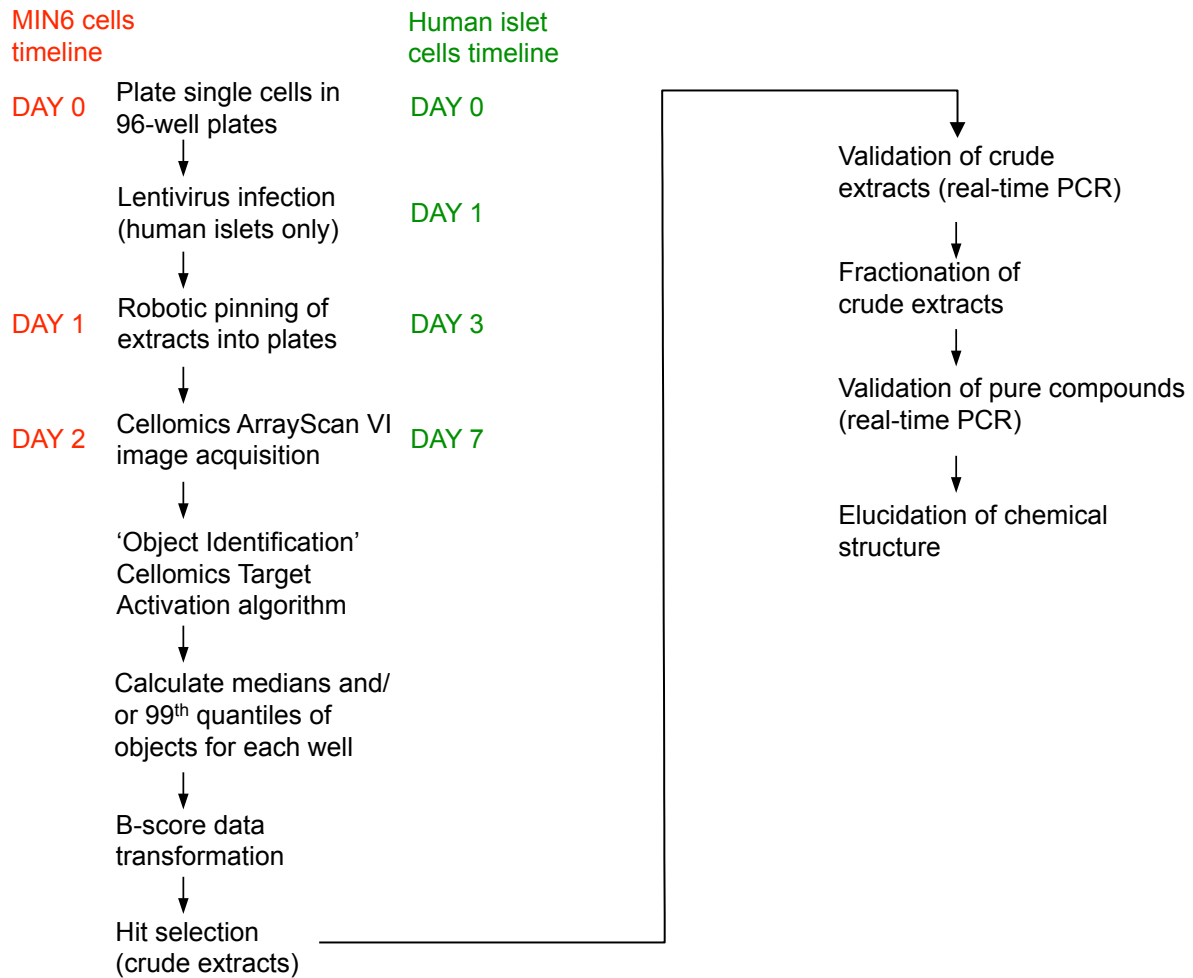

Supplement: pone.0012958.s002.pdf [file pone.0012958.s002.pdf]
