# Supplementary material for: A Multi-Parameter, High-Content, High-Throughput Screening Platform to Identify Natural Compounds that Modulate Insulin and Pdx1 Expression
Source: PubMed Central journal article supplement (PMC2944895; doi:10.1371/journal.pone.0012958), 2010-09-23
Supplement: pone.0012958.s007.pdf [file pone.0012958.s007.pdf]

Figure S6

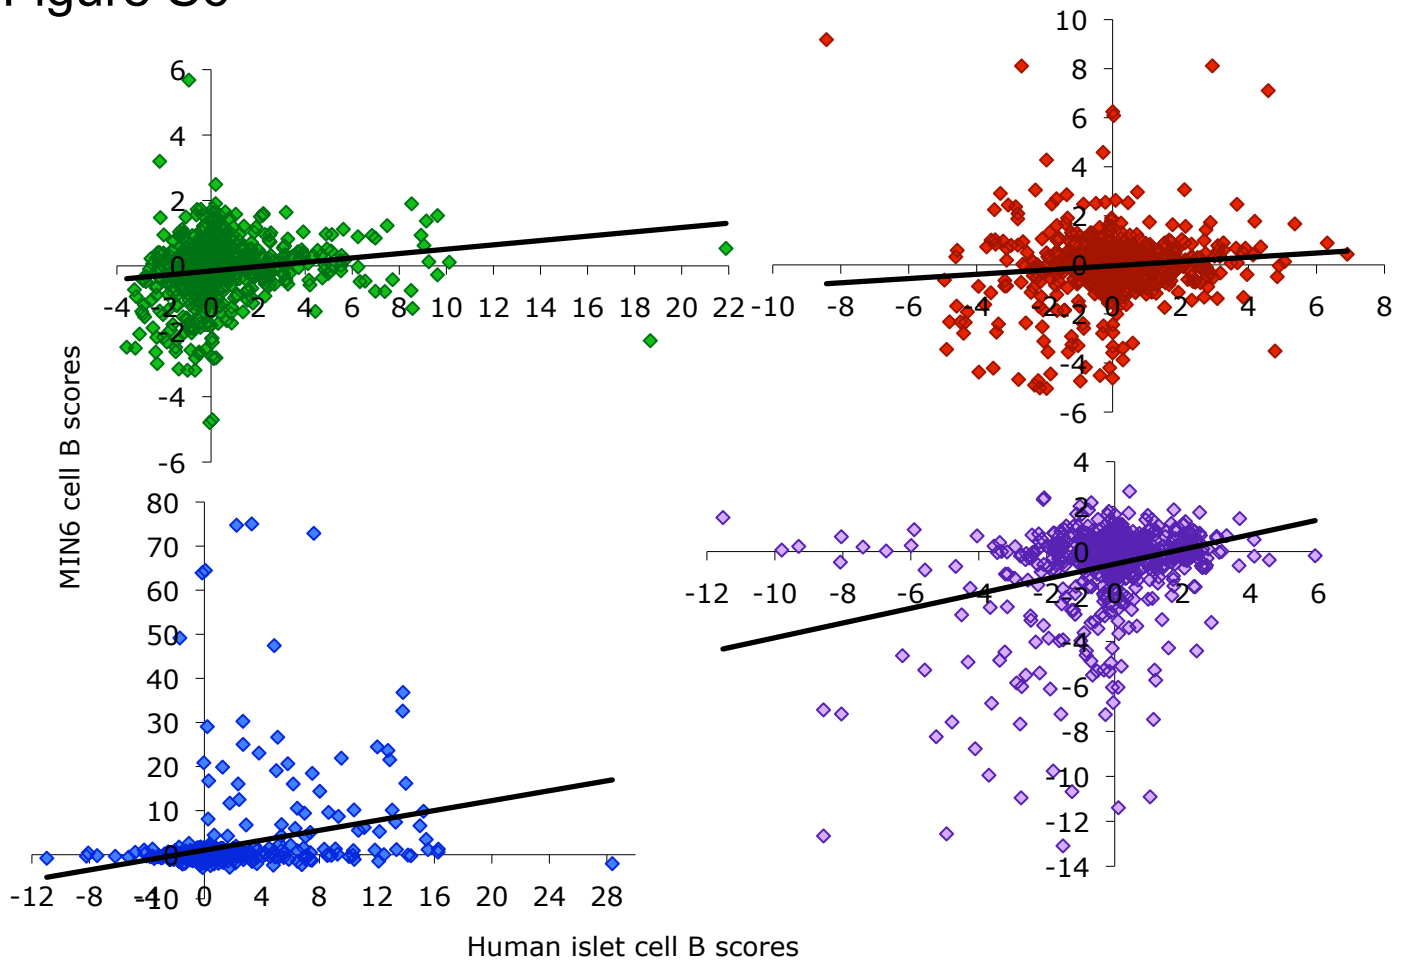

Spearman's rank correlation coefficient of mean MIN6 data and human islet screen.

|             | S        | $\rho$     | p-value     |
|-------------|----------|------------|-------------|
| Insulin     | 44880085 | 0.2047430  | 0.000000049 |
| Pdx-1       | 53095232 | 0.05917395 | 0.1186      |
| Hoechst     | 44375644 | 0.2136815  | 0.000000013 |
| Cell number | 47665643 | 0.1553841  | 0.0000379   |
