# Supplementary figures and images for: A Multi-Parameter, High-Content, High-Throughput Screening Platform to Identify Natural Compounds that Modulate Insulin and Pdx1 Expression
Source: PLOS journal article supplement (doi:10.1371/journal.pone.0012958), 2010-09-23

Figure S3

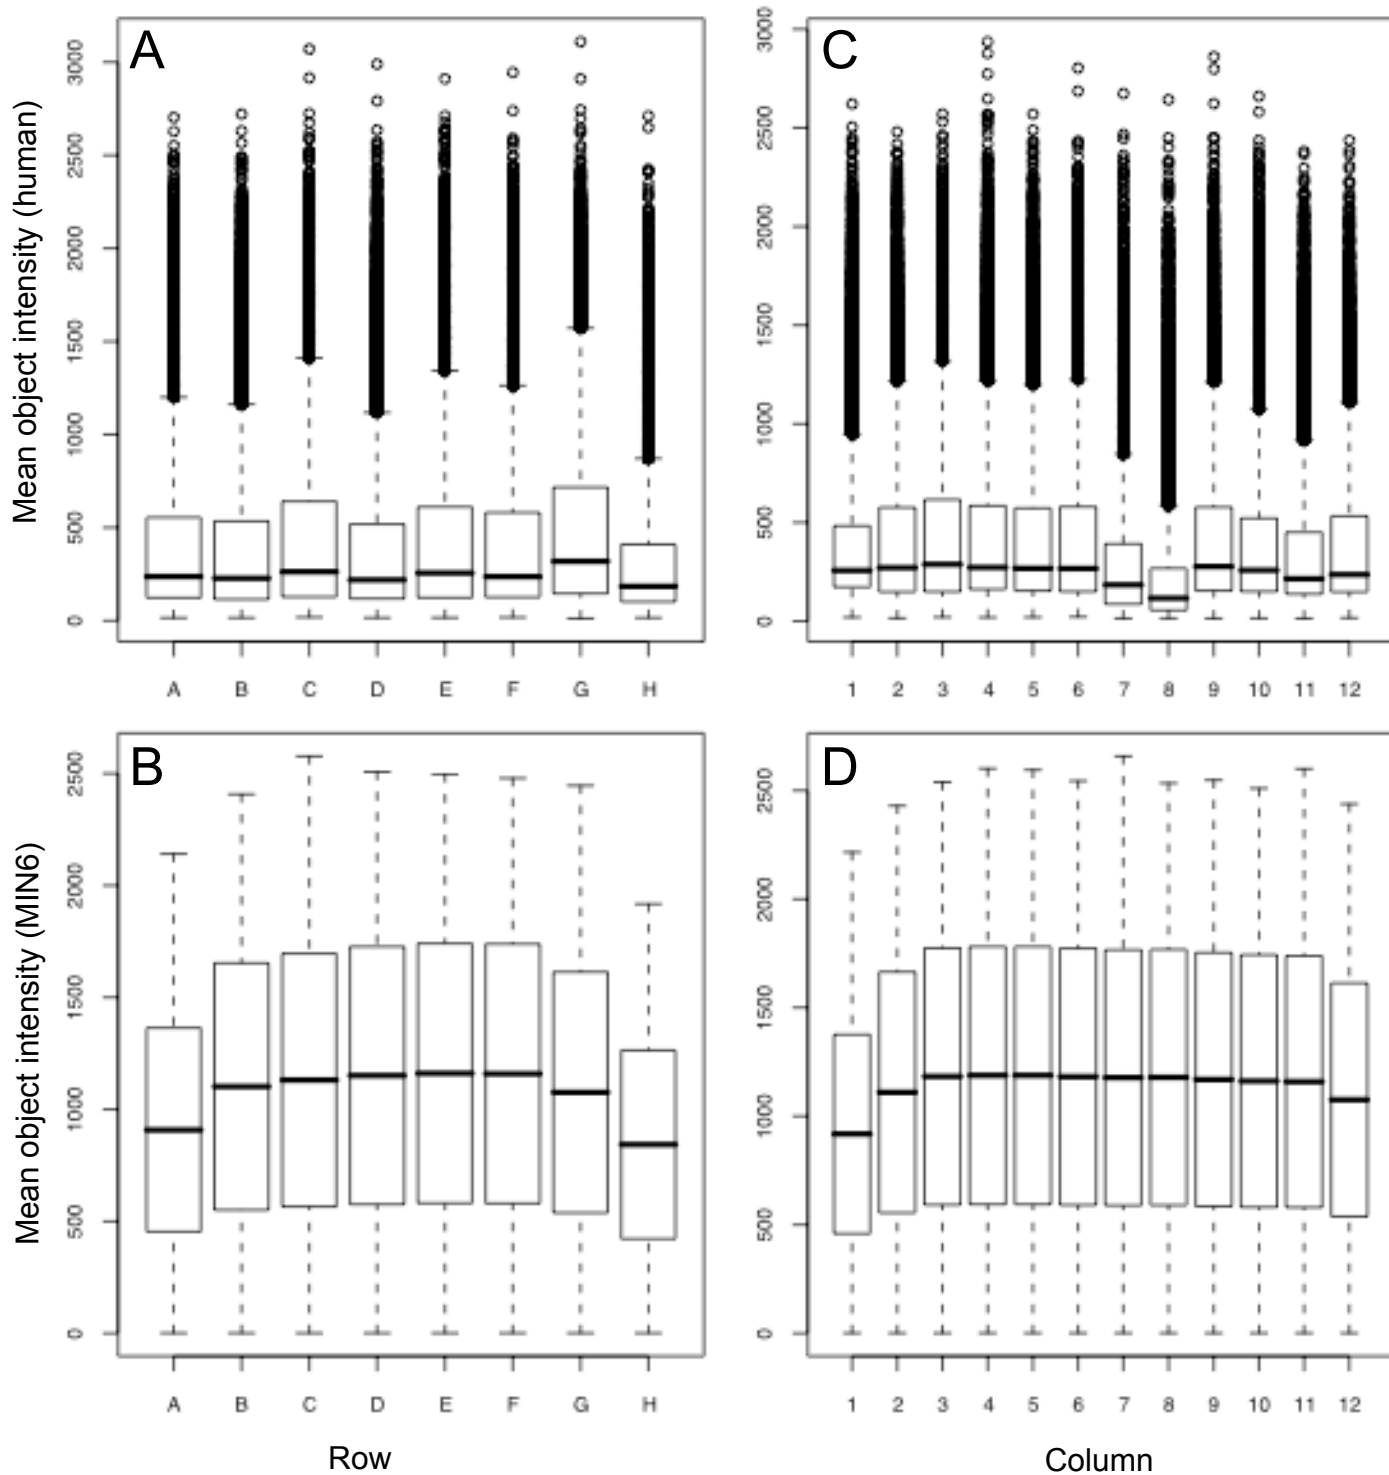

Supplement: S4 (10.1371/journal.pone.0012958.s004) [file journal.pone.0012958.s004]

# Figure S7

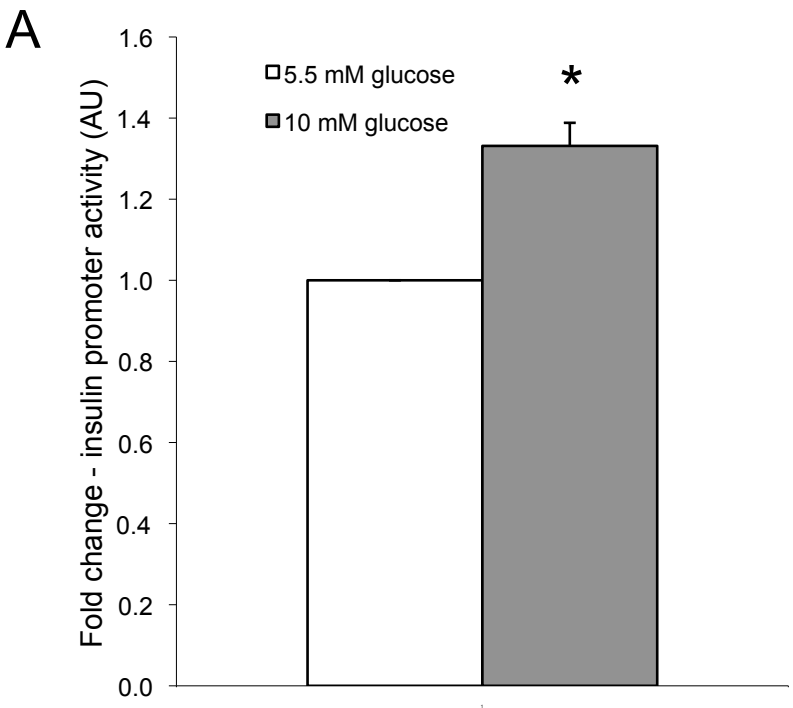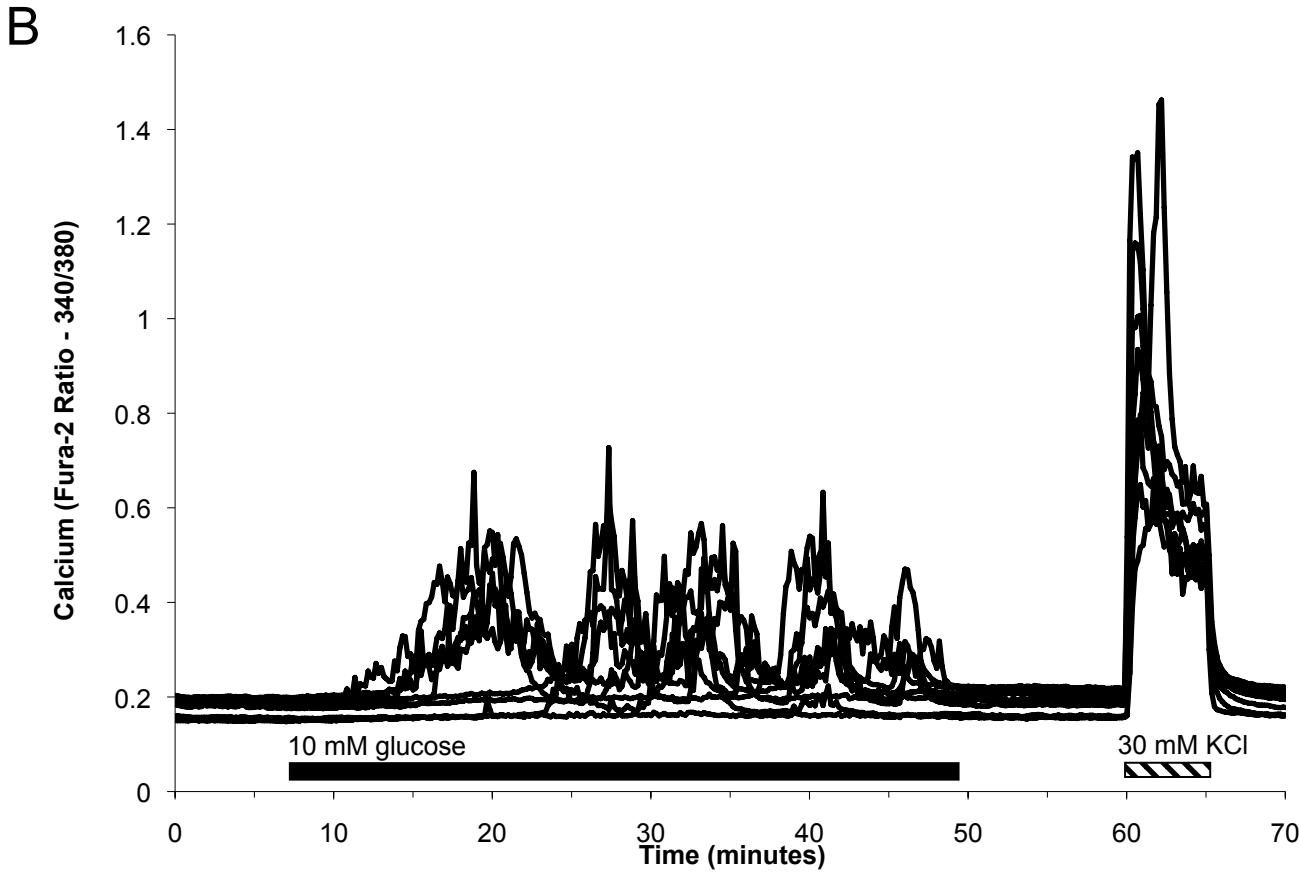

Supplement: S8 (10.1371/journal.pone.0012958.s008) [file journal.pone.0012958.s008]
